# Supplementary material
Source: Springer Nature journal article supplement (https://www.springermedizin.de/resource/supplementary/13014_2008_117_MOESM2_ESM.pdf/9632944)

(a)

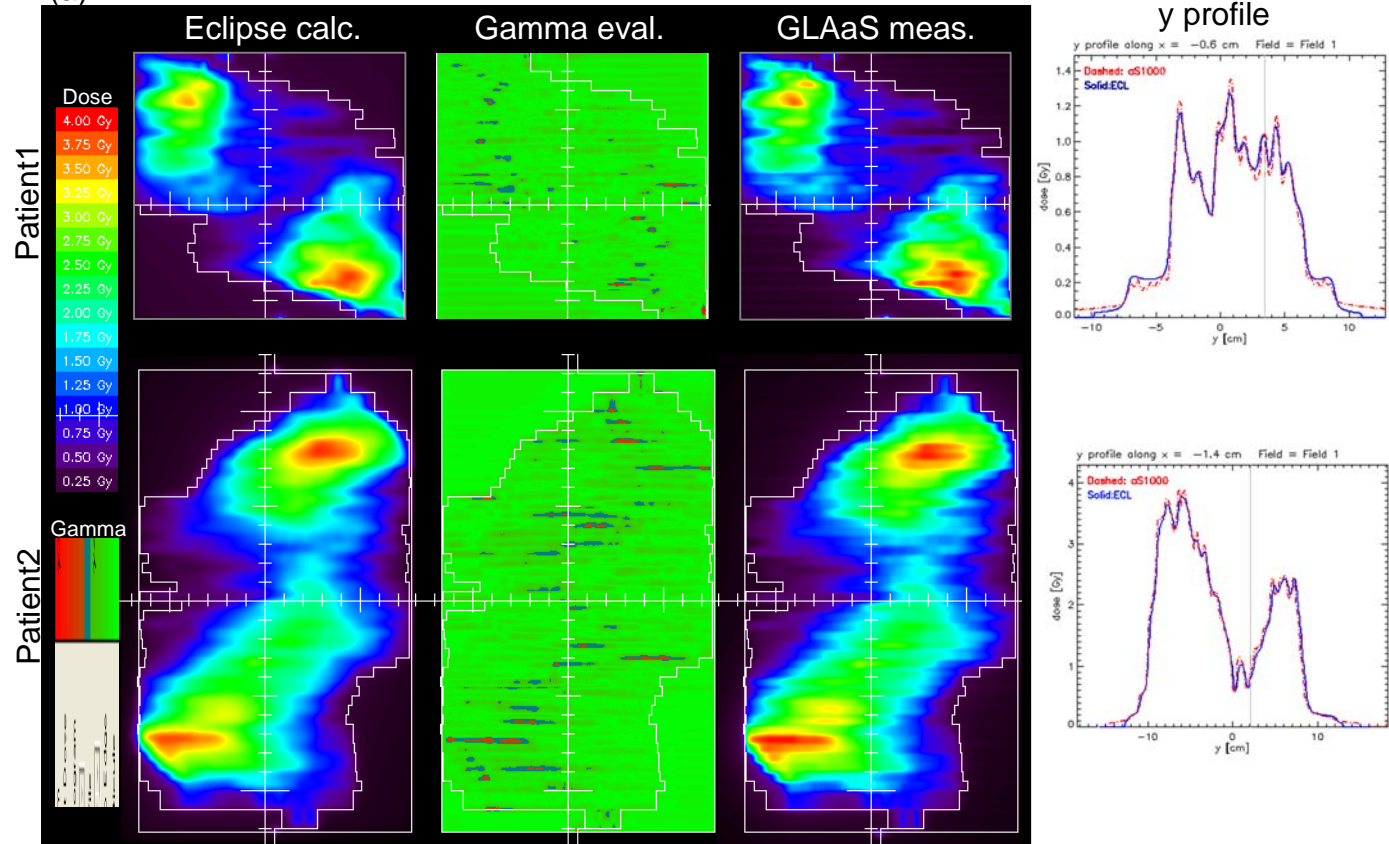

(b)

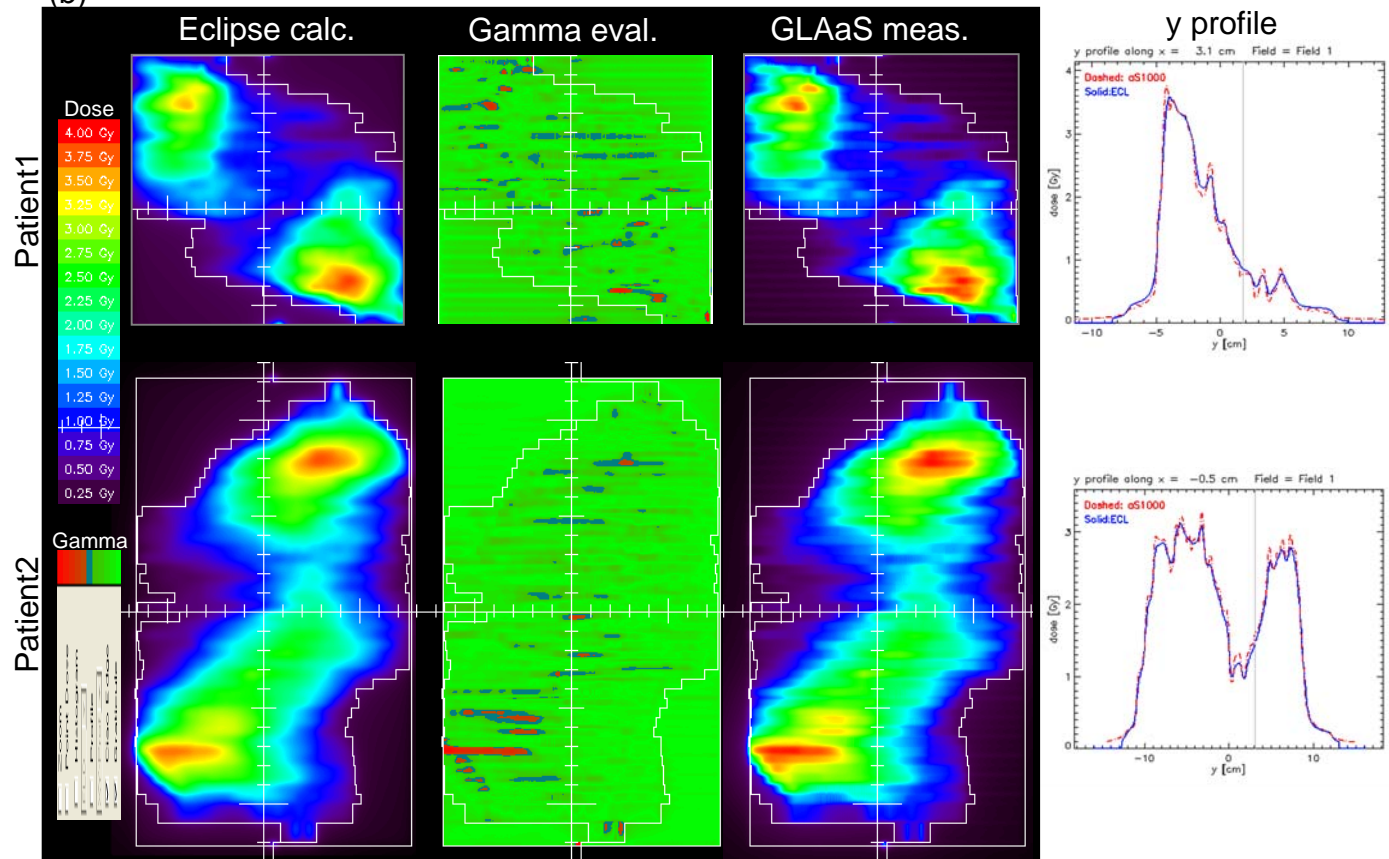

Supplement: MOESM2 [file 9632944]
